# Supplementary material
Source: PubMed Central journal article supplement (PMC3309722)
Supplement: 1115430109_pnas.201115430SI.pdf [file 1115430109_pnas.201115430SI.pdf]

# Supporting Information

Yang et al. 10.1073/pnas.1115430109

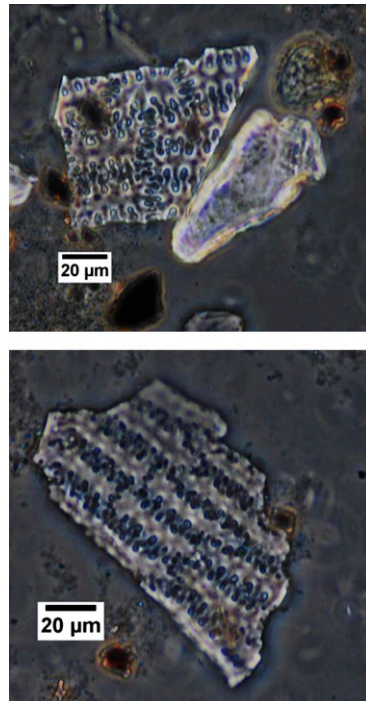

Fig. S1. Phytoliths of broomcorn millet recovered from the ash sample collected from a fireplace (field no. T4:HD8) of the late occupational phase of the Donghulin site.

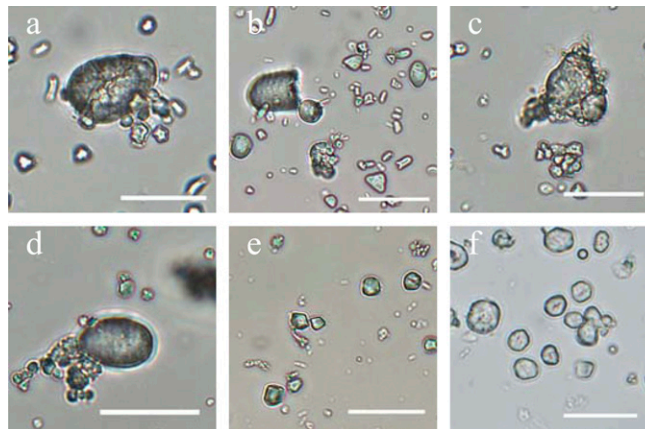

Fig. S2. Starch grains from some modern species within Poaceae. (A) *Lolium perenne*, simple and compound starch grains. Range, 2.8–8.0  $\mu\text{m}$ ; mean,  $4.8 \pm 0.8 \mu\text{m}$ . (B) *Poa annua*, simple and compound starch grains. Range, 2.6–5.3  $\mu\text{m}$ ; mean,  $4.1 \pm 0.9 \mu\text{m}$ . (C) *Milium effusum*, simple and compound starch grains. Range, 2.6–5.3  $\mu\text{m}$ ; mean,  $3.7 \pm 0.5 \mu\text{m}$ . (D) *Alopecurus aequalis*, simple and compound starch grains. Range, 2.2–4.2  $\mu\text{m}$ ; mean,  $3.3 \pm 0.6 \mu\text{m}$ . (E) *Digitaria sanguinalis*, range, 4.0–8.3  $\mu\text{m}$ ; mean,  $5.8 \pm 1.0 \mu\text{m}$ . (F) *Echinochloa colonum*, range, 5.6–14.0  $\mu\text{m}$ ; mean,  $8.9 \pm 1.6 \mu\text{m}$ . (Scale bar: 10  $\mu\text{m}$ .)

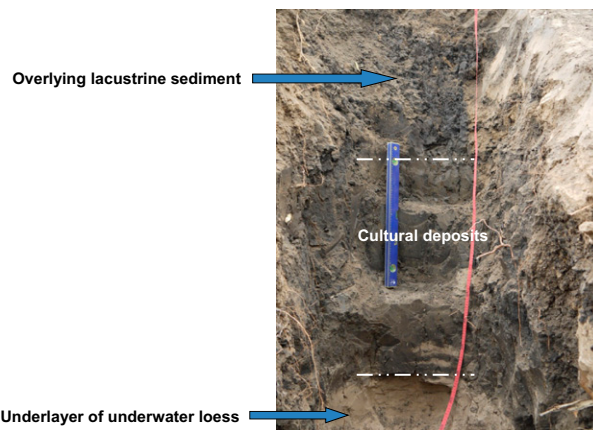

Fig. S3. Strata from which the control samples were collected at the Nanzhuangtou site. The length of blue leveling rod is 50 cm.

Table S1. Dates from the Nanzhuangtou site

| Lab no.  | Sample       | $^{14}\text{C}$ , y B.P., uncalibrated | Calibrated dates, y B.P., 68% | Calibrated dates, y B.C. |
|----------|--------------|----------------------------------------|-------------------------------|--------------------------|
| BK87086  | Organic silt | 9,980 $\pm$ 100                        | 11,512 $\pm$ 185              | 9,562 $\pm$ 185          |
| BK87088  | Organic silt | 10,815 $\pm$ 140                       | 12,798 $\pm$ 134              | 10,848 $\pm$ 134         |
| BK86120  | Wood         | 9,875 $\pm$ 160                        | 11,411 $\pm$ 261              | 9,461 $\pm$ 261          |
| BK86121* | Wood         | 9,690 $\pm$ 95                         | 11,018 $\pm$ 163              | 9,068 $\pm$ 163          |
| BK87093  | Wood         | 9,810 $\pm$ 100                        | 11,248 $\pm$ 129              | 9,298 $\pm$ 129          |
| BK87075* | Charcoal     | 10,510 $\pm$ 110                       | 12,408 $\pm$ 211              | 10,458 $\pm$ 211         |
| BK89064  | Wood         | 9,850 $\pm$ 90                         | 11,337 $\pm$ 122              | 9,387 $\pm$ 122          |

\*Samples were collected from zone 5. Dates were calibrated by online Calpal software (<http://www.calpal-online.de/>).
